# Supplementary material for: Targets and Effects of Common Biocompounds of Hibiscus sabdariffa (Delphinidin-3-Sambubiosid, Quercetin, and Hibiscus Acid) in Different Pathways of Human Cells According to a Bioinformatic Assay
Source: MDPI journal article supplement (doi:10.3390/nu16040566), 2024-02-19
Supplement: s1 [file s1]

## Supplementary Material S1

### Most likely targets for DS3

Table 11. Most likely targets for DS3

| Target                                  | Common name | Uniprot ID | ChEMBL ID     | Target Class                        | Probability* | Known actives (3D/2D) |
|-----------------------------------------|-------------|------------|---------------|-------------------------------------|--------------|-----------------------|
| Lymphocyte differentiation antigen CD38 | CD38        | P28907     | CHEMBL4660    | Enzyme                              | 0.109232505  | 0 / 1                 |
| Neuromedin-U receptor 2                 | NMUR2       | Q9GZQ4     | CHEMBL1075144 | Family A G protein-coupled receptor | 0.109232505  | 0 / 1                 |
| Alpha-2a adrenergic receptor            | ADRA2A      | P08913     | CHEMBL1867    | Family A G protein-coupled receptor | 0.109232505  | 0 / 2                 |
| Adrenergic receptor alpha-2             | ADRA2C      | P18825     | CHEMBL1916    | Family A G protein-coupled receptor | 0.109232505  | 0 / 10                |
| Acetylcholinesterase                    | ACHE        | P22303     | CHEMBL220     | Hydrolase                           | 0.109232505  | 1 / 2                 |
| Aldose reductase (by homology)          | AKR1B1      | P15121     | CHEMBL1900    | Enzyme                              | 0.100214944  | 0 / 48                |
| NADPH oxidase 4                         | NOX4        | Q9NPH5     | CHEMBL1250375 | Enzyme                              | 0.100214944  | 0 / 4                 |
| Carbonic anhydrase II                   | CA2         | P00918     | CHEMBL205     | Lyase                               | 0.100214944  | 0 / 8                 |
| Carbonic anhydrase VII                  | CA7         | P43166     | CHEMBL2326    | Lyase                               | 0.100214944  | 0 / 10                |
| Carbonic anhydrase XII                  | CA12        | O43570     | CHEMBL3242    | Lyase                               | 0.100214944  | 0 / 17                |
| Carbonic anhydrase IV                   | CA4         | P22748     | CHEMBL3729    | Lyase                               | 0.100214944  | 0 / 8                 |
| Quinone reductase 2                     | NQO2        | P16083     | CHEMBL3959    | Enzyme                              | 0.09120885   | 0 / 19                |
| Ribosomal protein S6 kinase alpha 3     | RPS6KA3     | P51812     | CHEMBL2345    | Kinase                              | 0.09120885   | 0 / 1                 |
| Adenosine A1 receptor (by homology)     | ADORA1      | P30542     | CHEMBL226     | Family A G protein-coupled receptor | 0.082221517  | 0 / 1                 |
| Cyclooxygenase-2                        | PTGS2       | P35354     | CHEMBL230     | Oxidoreductase                      | 0.082221517  | 0 / 12                |
| Xanthine dehydrogenase                  | XDH         | P47989     | CHEMBL1929    | Oxidoreductase                      | 0.082221517  | 0 / 4                 |
| Phosphodiesterase 5A                    | PDE5A       | O76074     | CHEMBL1827    | Phosphodiesterase                   | 0.082221517  | 0 / 3                 |
| TNF-alpha                               | TNF         | P01375     | CHEMBL1825    | Secreted protein                    | 0.082221517  | 0 / 4                 |
| Interleukin-2                           | IL2         | P60568     | CHEMBL5880    | Secreted protein                    | 0.082221517  | 0 / 7                 |
| Cytochrome P450 1B1                     | CYP1B1      | Q16678     | CHEMBL4878    | Cytochrome P450                     | 0            | 0 / 11                |
| Cytochrome P450 19A1                    | CYP19A1     | P11511     | CHEMBL1978    | Cytochrome P450                     | 0            | 0 / 7                 |

|                                                      |         |        |               |                                     |   |        |
|------------------------------------------------------|---------|--------|---------------|-------------------------------------|---|--------|
| Sodium/glucose cotransporter 2                       | SLC5A2  | P31639 | CHEMBL3884    | Electrochemical transporter         | 0 | 0 / 10 |
| Sodium/glucose cotransporter 1                       | SLC5A1  | P13866 | CHEMBL4979    | Electrochemical transporter         | 0 | 0 / 3  |
| Low affinity sodium-glucose cotransporter            | SLC5A4  | Q9NY91 | CHEMBL1770047 | Electrochemical transporter         | 0 | 0 / 2  |
| Telomerase reverse transcriptase                     | TERT    | O14746 | CHEMBL2916    | Enzyme                              | 0 | 0 / 2  |
| Squalene monooxygenase (by homology)                 | SQLE    | Q14534 | CHEMBL3592    | Enzyme                              | 0 | 1 / 0  |
| Glyoxalase I                                         | GLO1    | Q04760 | CHEMBL2424    | Enzyme                              | 0 | 1 / 0  |
| Tyrosyl-DNA phosphodiesterase 1                      | TDP1    | Q9NUW8 | CHEMBL1075138 | Enzyme                              | 0 | 0 / 11 |
| Myeloperoxidase                                      | MPO     | P05164 | CHEMBL2439    | Enzyme                              | 0 | 0 / 1  |
| PI3-kinase p85-alpha subunit                         | PIK3R1  | P27986 | CHEMBL2506    | Enzyme                              | 0 | 0 / 21 |
| Liver glycogen phosphorylase                         | PYGL    | P06737 | CHEMBL2568    | Enzyme                              | 0 | 0 / 9  |
| Estradiol 17-beta-dehydrogenase 2                    | HSD17B2 | P37059 | CHEMBL2789    | Enzyme                              | 0 | 0 / 1  |
| Arachidonate 15-lipoxygenase                         | ALOX15  | P16050 | CHEMBL2903    | Enzyme                              | 0 | 0 / 1  |
| PI3-kinase p110-gamma subunit                        | PIK3CG  | P48736 | CHEMBL3267    | Enzyme                              | 0 | 0 / 2  |
| Arachidonate 12-lipoxygenase                         | ALOX12  | P18054 | CHEMBL3687    | Enzyme                              | 0 | 0 / 3  |
| Phospholipase A2 group 1B                            | PLA2G1B | P04054 | CHEMBL4426    | Enzyme                              | 0 | 0 / 1  |
| DNA-(apurinic or apyrimidinic site) lyase            | APEX1   | P27695 | CHEMBL5619    | Enzyme                              | 0 | 0 / 9  |
| Aldo-keto reductase family 1 member C2 (by homology) | AKR1C2  | P52895 | CHEMBL5847    | Enzyme                              | 0 | 0 / 4  |
| Lysine-specific demethylase 4D-like                  | KDM4E   | B2RXH2 | CHEMBL1293226 | Eraser                              | 0 | 0 / 9  |
| Adenosine A3 receptor                                | ADORA3  | P0DMS8 | CHEMBL256     | Family A G protein-coupled receptor | 0 | 0 / 11 |
| Dopamine D2 receptor (by homology)                   | DRD2    | P14416 | CHEMBL217     | Family A G protein-coupled receptor | 0 | 0 / 6  |
| Adenosine A2a receptor (by homology)                 | ADORA2A | P29274 | CHEMBL251     | Family A G protein-coupled receptor | 0 | 0 / 15 |

|                                               |         |        |               |                                     |   |       |
|-----------------------------------------------|---------|--------|---------------|-------------------------------------|---|-------|
| G-protein coupled receptor 35                 | GPR35   | Q9HC97 | CHEMBL1293267 | Family A G protein-coupled receptor | 0 | 0 / 1 |
| Vasopressin V2 receptor                       | AVPR2   | P30518 | CHEMBL1790    | Family A G protein-coupled receptor | 0 | 0 / 2 |
| Dopamine D4 receptor                          | DRD4    | P21917 | CHEMBL219     | Family A G protein-coupled receptor | 0 | 0 / 2 |
| Interleukin-8 receptor A                      | CXCR1   | P25024 | CHEMBL4029    | Family A G protein-coupled receptor | 0 | 0 / 1 |
| DNA topoisomerase II alpha                    | TOP2A   | P11388 | CHEMBL1806    | Isomerase                           | 0 | 0 / 1 |
| Tyrosine-protein kinase SRC                   | SRC     | P12931 | CHEMBL267     | Kinase                              | 0 | 0 / 2 |
| Epidermal growth factor receptor erbB1        | EGFR    | P00533 | CHEMBL203     | Kinase                              | 0 | 0 / 1 |
| Insulin-like growth factor I receptor         | IGF1R   | P08069 | CHEMBL1957    | Kinase                              | 0 | 0 / 1 |
| Tyrosine-protein kinase receptor FLT3         | FLT3    | P36888 | CHEMBL1974    | Kinase                              | 0 | 0 / 1 |
| Insulin receptor                              | INSR    | P06213 | CHEMBL1981    | Kinase                              | 0 | 0 / 1 |
| Serine/threonine-protein kinase PIM1          | PIM1    | P11309 | CHEMBL2147    | Kinase                              | 0 | 0 / 1 |
| Serine/threonine-protein kinase Aurora-B      | AURKB   | Q96GD4 | CHEMBL2185    | Kinase                              | 0 | 0 / 1 |
| Myosin light chain kinase, smooth muscle      | MYLK    | Q15746 | CHEMBL2428    | Kinase                              | 0 | 0 / 1 |
| Death-associated protein kinase 1             | DAPK1   | P53355 | CHEMBL2558    | Kinase                              | 0 | 0 / 1 |
| Tyrosine-protein kinase SYK                   | SYK     | P43405 | CHEMBL2599    | Kinase                              | 0 | 0 / 2 |
| Glycogen synthase kinase-3 beta               | GSK3B   | P49841 | CHEMBL262     | Kinase                              | 0 | 0 / 2 |
| Focal adhesion kinase 1                       | PTK2    | Q05397 | CHEMBL2695    | Kinase                              | 0 | 0 / 1 |
| Vascular endothelial growth factor receptor 2 | KDR     | P35968 | CHEMBL279     | Kinase                              | 0 | 0 / 2 |
| Serine/threonine-protein kinase PLK1          | PLK1    | P53350 | CHEMBL3024    | Kinase                              | 0 | 0 / 1 |
| Cyclin-dependent kinase 1                     | CDK1    | P06493 | CHEMBL308     | Kinase                              | 0 | 0 / 1 |
| Protein kinase N1                             | PKN1    | Q16512 | CHEMBL3384    | Kinase                              | 0 | 0 / 1 |
| Casein kinase II alpha                        | CSNK2A1 | P68400 | CHEMBL3629    | Kinase                              | 0 | 0 / 1 |

|                                                             |         |        |            |                            |   |       |
|-------------------------------------------------------------|---------|--------|------------|----------------------------|---|-------|
| Hepatocyte growth factor receptor                           | MET     | P08581 | CHEMBL3717 | Kinase                     | 0 | 0 / 1 |
| Serine/threonine-protein kinase NEK2                        | NEK2    | P51955 | CHEMBL3835 | Kinase                     | 0 | 0 / 1 |
| CaM kinase II beta                                          | CAMK2B  | Q13554 | CHEMBL4121 | Kinase                     | 0 | 0 / 1 |
| ALK tyrosine kinase receptor                                | ALK     | Q9UM73 | CHEMBL4247 | Kinase                     | 0 | 0 / 1 |
| Serine/threonine-protein kinase AKT                         | AKT1    | P31749 | CHEMBL4282 | Kinase                     | 0 | 0 / 1 |
| Serine/threonine-protein kinase NEK6                        | NEK6    | Q9HC98 | CHEMBL4309 | Kinase                     | 0 | 0 / 1 |
| Tyrosine-protein kinase receptor UFO                        | AXL     | P30530 | CHEMBL4895 | Kinase                     | 0 | 0 / 1 |
| NUAK family SNF1-like kinase 1                              | NUAK1   | O60285 | CHEMBL5784 | Kinase                     | 0 | 0 / 1 |
| Carbonic anhydrase I                                        | CA1     | P00915 | CHEMBL261  | Lyase                      | 0 | 0 / 1 |
| Carbonic anhydrase IX                                       | CA9     | Q16790 | CHEMBL3594 | Lyase                      | 0 | 0 / 1 |
| Carbonic anhydrase XIII                                     | CA13    | Q8N1Q1 | CHEMBL3912 | Lyase                      | 0 | 0 / 1 |
| Carbonic anhydrase III                                      | CA3     | P07451 | CHEMBL2885 | Lyase                      | 0 | 0 / 2 |
| Carbonic anhydrase VI                                       | CA6     | P23280 | CHEMBL3025 | Lyase                      | 0 | 0 / 1 |
| Carbonic anhydrase XIV                                      | CA14    | Q9ULX7 | CHEMBL3510 | Lyase                      | 0 | 0 / 1 |
| Carbonic anhydrase VA                                       | CA5A    | P35218 | CHEMBL4789 | Lyase                      | 0 | 0 / 1 |
| Beta amyloid A4 protein                                     | APP     | P05067 | CHEMBL2487 | Membrane receptor          | 0 | 0 / 1 |
| Sigma opioid receptor                                       | SIGMAR1 | Q99720 | CHEMBL287  | Membrane receptor          | 0 | 0 / 1 |
| LXR-alpha                                                   | NR1H3   | Q13133 | CHEMBL2808 | Nuclear receptor           | 0 | 0 / 1 |
| Induced myeloid leukemia cell differentiation protein Mcl-1 | MCL1    | Q07820 | CHEMBL4361 | Other cytosolic protein    | 0 | 0 / 1 |
| Arachidonate 5-lipoxygenase                                 | ALOX5   | P09917 | CHEMBL215  | Oxidoreductase             | 0 | 0 / 1 |
| Aldehyde dehydrogenase                                      | ALDH2   | P05091 | CHEMBL1935 | Oxidoreductase             | 0 | 0 / 1 |
| Monoamine oxidase A                                         | MAOA    | P21397 | CHEMBL1951 | Oxidoreductase             | 0 | 0 / 2 |
| ATP-binding cassette sub-family G member 2                  | ABCG2   | Q9UNQ0 | CHEMBL5393 | Primary active transporter | 0 | 0 / 1 |
| Multidrug resistance-associated protein 1                   | ABCC1   | P33527 | CHEMBL3004 | Primary active transporter | 0 | 0 / 1 |

|                                               |       |        |               |                            |   |       |
|-----------------------------------------------|-------|--------|---------------|----------------------------|---|-------|
| P-glycoprotein 1 (by homology)                | ABCB1 | P08183 | CHEMBL4302    | Primary active transporter | 0 | 0 / 1 |
| Thrombin and coagulation factor X             | F10   | P00742 | CHEMBL244     | Protease                   | 0 | 0 / 1 |
| Plasminogen                                   | PLG   | P00747 | CHEMBL1801    | Protease                   | 0 | 0 / 1 |
| Thrombin                                      | F2    | P00734 | CHEMBL204     | Protease                   | 0 | 0 / 1 |
| Matrix metalloproteinase 13                   | MMP13 | P45452 | CHEMBL280     | Protease                   | 0 | 0 / 1 |
| Matrix metalloproteinase 3                    | MMP3  | P08254 | CHEMBL283     | Protease                   | 0 | 0 / 1 |
| Matrix metalloproteinase 9                    | MMP9  | P14780 | CHEMBL321     | Protease                   | 0 | 0 / 1 |
| Matrix metalloproteinase 2                    | MMP2  | P08253 | CHEMBL333     | Protease                   | 0 | 0 / 2 |
| Beta-secretase 1                              | BACE1 | P56817 | CHEMBL4822    | Protease                   | 0 | 0 / 1 |
| Hypoxia-inducible factor 1 alpha              | HIF1A | Q16665 | CHEMBL4261    | Transcription factor       | 0 | 0 / 1 |
| Microtubule-associated protein tau            | MAPT  | P10636 | CHEMBL1293224 | Unclassified protein       | 0 | 0 / 1 |
| Voltage-gated potassium channel subunit Kv1.3 | KCNA3 | P22001 | CHEMBL4633    | Voltage-gated ion channel  | 0 | 0 / 1 |

## Most likely targets for QRC.

Table 12. Most likely targets of QRC

| Target                  | Common name | Uniprot ID | ChEMBL ID     | Target Class                        | Probability* | Known actives (3D/2D) |
|-------------------------|-------------|------------|---------------|-------------------------------------|--------------|-----------------------|
| NADPH oxidase 4         | NOX4        | Q9NPH5     | CHEMBL1250375 | Enzyme                              | 1.0          | 7 / 8                 |
| Vasopressin V2 receptor | AVPR2       | P30518     | CHEMBL1790    | Family A G protein-coupled receptor | 1.0          | 1 / 1                 |
| Aldose reductase        | AKR1B1      | P15121     | CHEMBL1900    | Enzyme                              | 1.0          | 18 / 72               |

|                                          |         |        |            |                                     |     |         |
|------------------------------------------|---------|--------|------------|-------------------------------------|-----|---------|
| Xanthine dehydrogenase                   | XDH     | P47989 | CHEMBL1929 | Oxidoreductase                      | 1.0 | 12 / 20 |
| Monoamine oxidase A                      | MAOA    | P21397 | CHEMBL1951 | Oxidoreductase                      | 1.0 | 4 / 14  |
| Insulin-like growth factor I receptor    | IGF1R   | P08069 | CHEMBL1957 | Kinase                              | 1.0 | 3 / 3   |
| Tyrosine-protein kinase receptor FLT3    | FLT3    | P36888 | CHEMBL1974 | Kinase                              | 1.0 | 5 / 7   |
| Cytochrome P450 19A1                     | CYP19A1 | P11511 | CHEMBL1978 | Cytochrome P450                     | 1.0 | 5 / 18  |
| Epidermal growth factor receptor erbB1   | EGFR    | P00533 | CHEMBL203  | Kinase                              | 1.0 | 5 / 28  |
| Thrombin                                 | F2      | P00734 | CHEMBL204  | Protease                            | 1.0 | 11 / 3  |
| Carbonic anhydrase II                    | CA2     | P00918 | CHEMBL205  | Lyase                               | 1.0 | 7 / 15  |
| Serine/threonine-protein kinase PIM1     | PIM1    | P11309 | CHEMBL2147 | Kinase                              | 1.0 | 7 / 7   |
| Arachidonate 5-lipoxygenase              | ALOX5   | P09917 | CHEMBL215  | Oxidoreductase                      | 1.0 | 5 / 46  |
| Serine/threonine-protein kinase Aurora-B | AURKB   | Q96GD4 | CHEMBL2185 | Kinase                              | 1.0 | 3 / 4   |
| Dopamine D4 receptor                     | DRD4    | P21917 | CHEMBL219  | Family A G protein-coupled receptor | 1.0 | 1 / 1   |
| Adenosine A1 receptor (by homology)      | ADORA1  | P30542 | CHEMBL226  | Family A G protein-coupled receptor | 1.0 | 6 / 23  |
| Carbonic anhydrase VII                   | CA7     | P43166 | CHEMBL2326 | Lyase                               | 1.0 | 8 / 14  |
| Glyoxalase I                             | GLO1    | Q04760 | CHEMBL2424 | Enzyme                              | 1.0 | 3 / 4   |
| Myeloperoxidase                          | MPO     | P05164 | CHEMBL2439 | Enzyme                              | 1.0 | 1 / 1   |
| PI3-kinase p85-alpha subunit             | PIK3R1  | P27986 | CHEMBL2506 | Enzyme                              | 1.0 | 1 / 1   |
| Adenosine A2a receptor (by homology)     | ADORA2A | P29274 | CHEMBL251  | Family A G protein-coupled receptor | 1.0 | 5 / 11  |
| Death-associated protein kinase 1        | DAPK1   | P53355 | CHEMBL2558 | Kinase                              | 1.0 | 2 / 2   |
| Liver glycogen phosphorylase             | PYGL    | P06737 | CHEMBL2568 | Enzyme                              | 1.0 | 1 / 1   |
| Carbonic anhydrase I                     | CA1     | P00915 | CHEMBL261  | Lyase                               | 1.0 | 3 / 5   |
| Glycogen synthase kinase-3 beta          | GSK3B   | P49841 | CHEMBL262  | Kinase                              | 1.0 | 3 / 6   |
| Tyrosine-protein kinase SRC              | SRC     | P12931 | CHEMBL267  | Kinase                              | 1.0 | 2 / 10  |
| Focal adhesion kinase 1                  | PTK2    | Q05397 | CHEMBL2695 | Kinase                              | 1.0 | 1 / 2   |
| Estradiol 17-beta-dehydrogenase 2        | HSD17B2 | P37059 | CHEMBL2789 | Enzyme                              | 1.0 | 8 / 3   |

|                                               |         |        |            |                                     |     |         |
|-----------------------------------------------|---------|--------|------------|-------------------------------------|-----|---------|
| Vascular endothelial growth factor receptor 2 | KDR     | P35968 | CHEMBL279  | Kinase                              | 1.0 | 2 / 3   |
| Matrix metalloproteinase 13                   | MMP13   | P45452 | CHEMBL280  | Protease                            | 1.0 | 1 / 1   |
| Matrix metalloproteinase 3                    | MMP3    | P08254 | CHEMBL283  | Protease                            | 1.0 | 1 / 1   |
| Carbonic anhydrase III                        | CA3     | P07451 | CHEMBL2885 | Lyase                               | 1.0 | 1 / 1   |
| Arachidonate 15-lipoxygenase                  | ALOX15  | P16050 | CHEMBL2903 | Enzyme                              | 1.0 | 4 / 8   |
| Multidrug resistance-associated protein 1     | ABCC1   | P33527 | CHEMBL3004 | Primary active transporter          | 1.0 | 7 / 11  |
| Serine/threonine-protein kinase PLK1          | PLK1    | P53350 | CHEMBL3024 | Kinase                              | 1.0 | 2 / 3   |
| Carbonic anhydrase VI                         | CA6     | P23280 | CHEMBL3025 | Lyase                               | 1.0 | 1 / 1   |
| Cyclin-dependent kinase 1                     | CDK1    | P06493 | CHEMBL308  | Kinase                              | 1.0 | 2 / 13  |
| Matrix metalloproteinase 9                    | MMP9    | P14780 | CHEMBL321  | Protease                            | 1.0 | 2 / 2   |
| Carbonic anhydrase XII                        | CA12    | O43570 | CHEMBL3242 | Lyase                               | 1.0 | 8 / 17  |
| Matrix metalloproteinase 2                    | MMP2    | P08253 | CHEMBL333  | Protease                            | 1.0 | 2 / 2   |
| Protein kinase N1                             | PKN1    | Q16512 | CHEMBL3384 | Kinase                              | 1.0 | 1 / 3   |
| Carbonic anhydrase XIV                        | CA14    | Q9ULX7 | CHEMBL3510 | Lyase                               | 1.0 | 1 / 1   |
| Carbonic anhydrase IX                         | CA9     | Q16790 | CHEMBL3594 | Lyase                               | 1.0 | 3 / 5   |
| Casein kinase II alpha                        | CSNK2A1 | P68400 | CHEMBL3629 | Kinase                              | 1.0 | 3 / 2   |
| Arachidonate 12-lipoxygenase                  | ALOX12  | P18054 | CHEMBL3687 | Enzyme                              | 1.0 | 5 / 10  |
| Hepatocyte growth factor receptor             | MET     | P08581 | CHEMBL3717 | Kinase                              | 1.0 | 2 / 4   |
| Carbonic anhydrase IV                         | CA4     | P22748 | CHEMBL3729 | Lyase                               | 1.0 | 7 / 13  |
| Serine/threonine-protein kinase NEK2          | NEK2    | P51955 | CHEMBL3835 | Kinase                              | 1.0 | 1 / 2   |
| Interleukin-8 receptor A                      | CXCR1   | P25024 | CHEMBL4029 | Family A G protein-coupled receptor | 1.0 | 1 / 1   |
| CaM kinase II beta                            | CAMK2B  | Q13554 | CHEMBL4121 | Kinase                              | 1.0 | 1 / 2   |
| ALK tyrosine kinase receptor                  | ALK     | Q9UM73 | CHEMBL4247 | Kinase                              | 1.0 | 2 / 4   |
| Serine/threonine-protein kinase AKT           | AKT1    | P31749 | CHEMBL4282 | Kinase                              | 1.0 | 1 / 4   |
| P-glycoprotein 1                              | ABCB1   | P08183 | CHEMBL4302 | Primary active transporter          | 1.0 | 11 / 48 |
| Serine/threonine-protein kinase NEK6          | NEK6    | Q9HC98 | CHEMBL4309 | Kinase                              | 1.0 | 1 / 2   |
| Phospholipase A2 group 1B                     | PLA2G1B | P04054 | CHEMBL4426 | Enzyme                              | 1.0 | 1 / 1   |

|                                                      |        |        |               |                                     |                |         |
|------------------------------------------------------|--------|--------|---------------|-------------------------------------|----------------|---------|
| Carbonic anhydrase VA                                | CA5A   | P35218 | CHEMBL4789    | Lyase                               | 1.0            | 1 / 1   |
| Beta-secretase 1                                     | BACE1  | P56817 | CHEMBL4822    | Protease                            | 1.0            | 8 / 14  |
| Cytochrome P450 1B1                                  | CYP1B1 | Q16678 | CHEMBL4878    | Cytochrome P450                     | 1.0            | 12 / 46 |
| Tyrosine-protein kinase receptor UFO                 | AXL    | P30530 | CHEMBL4895    | Kinase                              | 1.0            | 2 / 4   |
| ATP-binding cassette sub-family G member 2           | ABCG2  | Q9UNQ0 | CHEMBL5393    | Primary active transporter          | 1.0            | 6 / 50  |
| NUAK family SNF1-like kinase 1                       | NUAK1  | O60285 | CHEMBL5784    | Kinase                              | 1.0            | 1 / 2   |
| Aldo-keto reductase family 1 member C2 (by homology) | AKR1C2 | P52895 | CHEMBL5847    | Enzyme                              | 1.0            | 1 / 1   |
| Aldo-keto reductase family 1 member C1 (by homology) | AKR1C1 | Q04828 | CHEMBL5905    | Enzyme                              | 1.0            | 1 / 1   |
| Aldo-keto-reductase family 1 member C3 (by homology) | AKR1C3 | P42330 | CHEMBL4681    | Enzyme                              | 1.0            | 1 / 1   |
| Aldo-keto reductase family 1 member C4 (by homology) | AKR1C4 | P17516 | CHEMBL4999    | Enzyme                              | 1.0            | 1 / 1   |
| Carbonic anhydrase XIII (by homology)                | CA13   | Q8N1Q1 | CHEMBL3912    | Lyase                               | 1.0            | 1 / 1   |
| Aldehyde reductase (by homology)                     | AKR1A1 | P14550 | CHEMBL2246    | Enzyme                              | 1.0            | 1 / 1   |
| G-protein coupled receptor 35                        | GPR35  | Q9HC97 | CHEMBL1293267 | Family A G protein-coupled receptor | 1.0            | 2 / 4   |
| Microtubule-associated protein tau                   | MAPT   | P10636 | CHEMBL1293224 | Unclassified protein                | 0.68028359158  | 1 / 1   |
| Lysine-specific demethylase 4D-like                  | KDM4E  | B2RXH2 | CHEMBL1293226 | Eraser                              | 0.68028359158  | 2 / 2   |
| DNA topoisomerase II alpha                           | TOP2A  | P11388 | CHEMBL1806    | Isomerase                           | 0.68028359158  | 1 / 1   |
| Insulin receptor                                     | INSR   | P06213 | CHEMBL1981    | Kinase                              | 0.68028359158  | 1 / 1   |
| Acetylcholinesterase                                 | ACHE   | P22303 | CHEMBL220     | Hydrolase                           | 0.68028359158  | 4 / 27  |
| Myosin light chain kinase, smooth muscle             | MYLK   | Q15746 | CHEMBL2428    | Kinase                              | 0.68028359158  | 1 / 1   |
| Tyrosine-protein kinase SYK                          | SYK    | P43405 | CHEMBL2599    | Kinase                              | 0.68028359158  | 3 / 3   |
| PI3-kinase p110-gamma subunit                        | PIK3CG | P48736 | CHEMBL3267    | Enzyme                              | 0.68028359158  | 3 / 1   |
| DNA-(apurinic or apyrimidinic site) lyase            | APEX1  | P27695 | CHEMBL5619    | Enzyme                              | 0.68028359158  | 1 / 1   |
| Receptor-type tyrosine-protein phosphatase S         | PTPRS  | Q13332 | CHEMBL2396508 | Phosphatase                         | 0.545871744949 | 6 / 8   |
| Estrogen receptor beta                               | ESR2   | Q92731 | CHEMBL242     | Nuclear receptor                    | 0.545871744949 | 62 / 29 |



|                                            |                                 |                                      |               |                             |                |        |
|--------------------------------------------|---------------------------------|--------------------------------------|---------------|-----------------------------|----------------|--------|
| DNA-3-methyladenine glycosylase            | MPG                             | P29372                               | CHEMBL3396943 | Enzyme                      | 0.545871744949 | 1 / 1  |
| Solute carrier family 22 member 12         | SLC22A12                        | Q96S37                               | CHEMBL6120    | Electrochemical transporter | 0.545871744949 | 4 / 1  |
| Cyclin-dependent kinase 5/CDK5 activator 1 | CDK5R1<br>CDK5                  | Q15078<br>Q00535                     | CHEMBL1907600 | Kinase                      | 0.538061807395 | 6 / 18 |
| Cyclin-dependent kinase 1/cyclin B         | CCNB3<br>CDK1<br>CCNB1<br>CCNB2 | Q8WWL7<br>P06493<br>P14635<br>O95067 | CHEMBL2094127 | Other cytosolic protein     | 0.538061807395 | 4 / 9  |
| Arginase-1 (by homology)                   | ARG1                            | P05089                               | CHEMBL1075097 | Enzyme                      | 0.538061807395 | 2 / 2  |
| Cyclin-dependent kinase 6                  | CDK6                            | Q00534                               | CHEMBL2508    | Kinase                      | 0.498513190462 | 3 / 4  |
| Cyclin-dependent kinase 2                  | CDK2                            | P24941                               | CHEMBL301     | Kinase                      | 0.498513190462 | 1 / 17 |
| Tyrosinase                                 | TYR                             | P14679                               | CHEMBL1973    | Oxidoreductase              | 0.395895175206 | 2 / 3  |
| Estradiol 17-beta-dehydrogenase 1          | HSD17B1                         | P14061                               | CHEMBL3181    | Enzyme                      | 0.395895175206 | 8 / 4  |
| Aryl hydrocarbon receptor                  | AHR                             | P35869                               | CHEMBL3201    | Transcription factor        | 0.395895175206 | 1 / 1  |
| Estrogen-related receptor alpha            | ESRRA                           | P11474                               | CHEMBL3429    | Nuclear receptor            | 0.395895175206 | 2 / 2  |
| Beta amyloid A4 protein                    | APP                             | P05067                               | CHEMBL2487    | Membrane receptor           | 0.261559713213 | 2 / 12 |
| Poly [ADP-ribose] polymerase-1             | PARP1                           | P09874                               | CHEMBL3105    | Enzyme                      | 0.261559713213 | 3 / 9  |
| Transthyretin                              | TTR                             | P02766                               | CHEMBL3194    | Secreted protein            | 0.261559713213 | 2 / 2  |
| Matrix metalloproteinase 12                | MMP12                           | P39900                               | CHEMBL4393    | Protease                    | 0.261559713213 | 1 / 1  |
| Lymphocyte differentiation antigen CD38    | CD38                            | P28907                               | CHEMBL4660    | Enzyme                      | 0.261559713213 | 2 / 3  |
| Aldo-keto reductase family 1 member B10    | AKR1B10                         | O60218                               | CHEMBL5983    | Enzyme                      | 0.261559713213 | 2 / 3  |
| Tankyrase-2                                | TNKS2                           | Q9H2K2                               | CHEMBL6154    | Enzyme                      | 0.261559713213 | 4 / 12 |
| Tankyrase-1                                | TNKS                            | O95271                               | CHEMBL6164    | Enzyme                      | 0.261559713213 | 4 / 28 |
| DNA topoisomerase I (by homology)          | TOP 1.00                        | P11387                               | CHEMBL1781    | Isomerase                   | 0.261559713213 | 1 / 1  |
| Telomerase reverse transcriptase           | TERT                            | O14746                               | CHEMBL2916    | Enzyme                      | 0.198389228663 | 9 / 22 |

## Most likely targets for HA

Table 13. Most likely targets for HA

|                                   |       |        |            |        |                 |       |
|-----------------------------------|-------|--------|------------|--------|-----------------|-------|
| ATP-citrate synthase              | ACLY  | P53396 | CHEMBL3720 | Enzyme | 0.765428310957  | 1 / 1 |
| Squalene synthetase (by homology) | FDFT1 | P37268 | CHEMBL3338 | Enzyme | 0.0721804396226 | 0 / 1 |

|                                                                       |           |                  |               |                                     |                 |       |
|-----------------------------------------------------------------------|-----------|------------------|---------------|-------------------------------------|-----------------|-------|
| Neuronal acetylcholine receptor protein alpha-7 subunit (by homology) | CHRNA7    | P36544           | CHEMBL2492    | Ligand-gated ion channel            | 0.0517133123472 | 0 / 2 |
| Egl nine homolog 1                                                    | EGLN1     | Q9GZT9           | CHEMBL5697    | Oxidoreductase                      | 0.0517133123472 | 0 / 2 |
| HMG-CoA reductase                                                     | HMGCR     | P04035           | CHEMBL402     | Oxidoreductase                      | 0.0517133123472 | 0 / 1 |
| Solute carrier family 22 member 6 (by homology)                       | SLC22A6   | Q4U2R8           | CHEMBL1641347 | Electrochemical transporter         | 0.0312265582077 | 0 / 2 |
| Protein farnesyltransferase                                           | FNTA FNTB | P49354<br>P49356 | CHEMBL2094108 | Enzyme                              | 0.0             | 0 / 5 |
| Excitatory amino acid transporter 3                                   | SLC1A1    | P43005           | CHEMBL2721    | Electrochemical transporter         | 0.0             | 0 / 3 |
| Prostanoid EP2 receptor                                               | PTGER2    | P43116           | CHEMBL1881    | Family A G protein-coupled receptor | 0.0             | 0 / 1 |
| Prostanoid FP receptor                                                | PTGFR     | P43088           | CHEMBL1987    | Family A G protein-coupled receptor | 0.0             | 0 / 1 |
| Niemann-Pick C1-like protein 1                                        | NPC1L1    | Q9UHC9           | CHEMBL2027    | Other membrane protein              | 0.0             | 0 / 2 |
| Hydroxyacid oxidase 1                                                 | HAO1      | Q9UJM8           | CHEMBL4229    | Enzyme                              | 0.0             | 0 / 1 |
| Lysine-specific demethylase 2A                                        | KDM2A     | Q9Y2K7           | CHEMBL1938210 | Eraser                              | 0.0             | 0 / 1 |
| Histone lysine demethylase PHF8                                       | PHF8      | Q9UPP1           | CHEMBL1938212 | Eraser                              | 0.0             | 0 / 1 |
| Lysine-specific demethylase 5C                                        | KDM5C     | P41229           | CHEMBL2163176 | Eraser                              | 0.0             | 0 / 1 |
| Metabotropic glutamate receptor 3                                     | GRM3      | Q14832           | CHEMBL2888    | Family C G protein-coupled receptor | 0.0             | 0 / 5 |
| Metabotropic glutamate receptor 2                                     | GRM2      | Q14416           | CHEMBL5137    | Family C G protein-coupled receptor | 0.0             | 0 / 9 |
| Glutamate receptor ionotropic kainate 1                               | GRIK1     | P39086           | CHEMBL1918    | Ligand-gated ion channel            | 0.0             | 0 / 5 |
| Glutamate receptor ionotropic, AMPA 1                                 | GRIA1     | P42261           | CHEMBL2009    | Ligand-gated ion channel            | 0.0             | 0 / 1 |
| Adenosine A3 receptor                                                 | ADORA3    | P0DMS8           | CHEMBL256     | Family A G protein-coupled receptor | 0.0             | 0 / 1 |
| Glutamate receptor ionotropic kainate 5                               | GRIK5     | Q16478           | CHEMBL2675    | Ligand-gated ion channel            | 0.0             | 0 / 1 |
| Metabotropic glutamate receptor 4                                     | GRM4      | Q14833           | CHEMBL2736    | Family C G protein-coupled receptor | 0.0             | 0 / 3 |

|                                                  |        |        |            |                                     |     |       |
|--------------------------------------------------|--------|--------|------------|-------------------------------------|-----|-------|
| Glutamate receptor ionotropic, AMPA 4            | GRIA4  | P48058 | CHEMBL3190 | Ligand-gated ion channel            | 0.0 | 0 / 1 |
| Metabotropic glutamate receptor 5                | GRM5   | P41594 | CHEMBL3227 | Family C G protein-coupled receptor | 0.0 | 0 / 2 |
| Metabotropic glutamate receptor 8                | GRM8   | O00222 | CHEMBL3228 | Family C G protein-coupled receptor | 0.0 | 0 / 3 |
| Glutamate receptor ionotropic kainate 2          | GRIK2  | Q13002 | CHEMBL3683 | Ligand-gated ion channel            | 0.0 | 0 / 4 |
| Glutamate receptor ionotropic kainate 3          | GRIK3  | Q13003 | CHEMBL3684 | Ligand-gated ion channel            | 0.0 | 0 / 1 |
| Metabotropic glutamate receptor 1                | GRM1   | Q13255 | CHEMBL3772 | Family C G protein-coupled receptor | 0.0 | 0 / 2 |
| Metabotropic glutamate receptor 7                | GRM7   | Q14831 | CHEMBL3777 | Family C G protein-coupled receptor | 0.0 | 0 / 1 |
| Glutamate receptor ionotropic, AMPA 2            | GRIA2  | P42262 | CHEMBL4016 | Ligand-gated ion channel            | 0.0 | 0 / 1 |
| Metabotropic glutamate receptor 6                | GRM6   | O15303 | CHEMBL4573 | Family C G protein-coupled receptor | 0.0 | 0 / 3 |
| UDP-glucuronosyltransferase 2B7                  | UGT2B7 | P16662 | CHEMBL4370 | Enzyme                              | 0.0 | 0 / 4 |
| Glutamate carboxypeptidase II                    | FOLH1  | Q04609 | CHEMBL1892 | Protease                            | 0.0 | 0 / 7 |
| 6-phosphogluconate dehydrogenase                 | PGD    | P52209 | CHEMBL3404 | Enzyme                              | 0.0 | 0 / 2 |
| Fatty acid binding protein adipocyte             | FABP4  | P15090 | CHEMBL2083 | Fatty acid binding protein family   | 0.0 | 0 / 1 |
| Peroxisome proliferator-activated receptor alpha | PPARA  | Q07869 | CHEMBL239  | Nuclear receptor                    | 0.0 | 0 / 3 |
| Fatty acid binding protein muscle                | FABP3  | P05413 | CHEMBL3344 | Fatty acid binding protein family   | 0.0 | 0 / 1 |
| Fatty acid binding protein epidermal             | FABP5  | Q01469 | CHEMBL3674 | Fatty acid binding protein family   | 0.0 | 0 / 1 |
| Peroxisome proliferator-activated receptor delta | PPARD  | Q03181 | CHEMBL3979 | Nuclear receptor                    | 0.0 | 0 / 2 |
| Free fatty acid receptor 1                       | FFAR1  | O14842 | CHEMBL4422 | Family A G protein-coupled receptor | 0.0 | 0 / 1 |
| Fatty acid binding protein intestinal            | FABP2  | P12104 | CHEMBL4879 | Fatty acid binding protein family   | 0.0 | 0 / 1 |
| Bile acid receptor FXR                           | NR1H4  | Q96RI1 | CHEMBL2047 | Nuclear receptor                    | 0.0 | 0 / 7 |

|                                                                 |                            |                            |               |                                     |     |        |
|-----------------------------------------------------------------|----------------------------|----------------------------|---------------|-------------------------------------|-----|--------|
| Glucose-6-phosphate 1-dehydrogenase                             | G6PD                       | P11413                     | CHEMBL5347    | Enzyme                              | 0.0 | 0 / 5  |
| G-protein coupled bile acid receptor 1                          | GPBAR1                     | Q8TDU6                     | CHEMBL5409    | Family A G protein-coupled receptor | 0.0 | 0 / 13 |
| Carnitine O-palmitoyltransferase 1, liver isoform (by homology) | CPT1A                      | P50416                     | CHEMBL1293194 | Enzyme                              | 0.0 | 0 / 4  |
| 11-beta-hydroxysteroid dehydrogenase 1                          | HSD11B1                    | P28845                     | CHEMBL4235    | Enzyme                              | 0.0 | 0 / 4  |
| 11-beta-hydroxysteroid dehydrogenase 2                          | HSD11B2                    | P80365                     | CHEMBL3746    | Enzyme                              | 0.0 | 0 / 1  |
| Androgen Receptor                                               | AR                         | P10275                     | CHEMBL1871    | Nuclear receptor                    | 0.0 | 0 / 4  |
| Vitamin D receptor                                              | VDR                        | P11473                     | CHEMBL1977    | Nuclear receptor                    | 0.0 | 0 / 1  |
| Cytochrome P450 19A1                                            | CYP19A1                    | P11511                     | CHEMBL1978    | Cytochrome P450                     | 0.0 | 0 / 3  |
| GABA A receptor alpha-2/beta-2/gamma-2                          | GABRA2<br>GABRB2<br>GABRG2 | P47869<br>P47870<br>P18507 | CHEMBL2111413 | Ligand-gated ion channel            | 0.0 | 0 / 1  |
| Dual specificity phosphatase Cdc25A                             | CDC25A                     | P30304                     | CHEMBL3775    | Phosphatase                         | 0.0 | 0 / 2  |
| Aldo-keto reductase family 1 member B10                         | AKR1B10                    | O60218                     | CHEMBL5983    | Enzyme                              | 0.0 | 0 / 1  |
| DNA polymerase beta (by homology)                               | POLB                       | P06746                     | CHEMBL2392    | Enzyme                              | 0.0 | 0 / 1  |
| Histone deacetylase 3                                           | HDAC3                      | O15379                     | CHEMBL1829    | Eraser                              | 0.0 | 0 / 1  |
| Excitatory amino acid transporter 2                             | SLC1A2                     | P43004                     | CHEMBL4973    | Electrochemical transporter         | 0.0 | 0 / 2  |
| Carbonic anhydrase I                                            | CA1                        | P00915                     | CHEMBL261     | Lyase                               | 0.0 | 0 / 1  |
| Carbonic anhydrase IX                                           | CA9                        | Q16790                     | CHEMBL3594    | Lyase                               | 0.0 | 0 / 1  |
| Aminopeptidase B                                                | RNPEP                      | Q9H4A4                     | CHEMBL2432    | Protease                            | 0.0 | 0 / 1  |
| Prostaglandin E synthase                                        | PTGES                      | O14684                     | CHEMBL5658    | Enzyme                              | 0.0 | 0 / 1  |
| Corticosteroid binding globulin                                 | SERPINA6                   | P08185                     | CHEMBL2421    | Secreted protein                    | 0.0 | 0 / 3  |
| Testis-specific androgen-binding protein                        | SHBG                       | P04278                     | CHEMBL3305    | Secreted protein                    | 0.0 | 0 / 9  |
| Estradiol 17-beta-dehydrogenase 3                               | HSD17B3                    | P37058                     | CHEMBL4234    | Enzyme                              | 0.0 | 0 / 10 |
| GABA-B receptor (by homology)                                   | GABBR1                     | Q9UBS5                     | CHEMBL2064    | Family C G protein-coupled receptor | 0.0 | 0 / 1  |

## Supplementary Material S2

### KEGG pathways for DS3

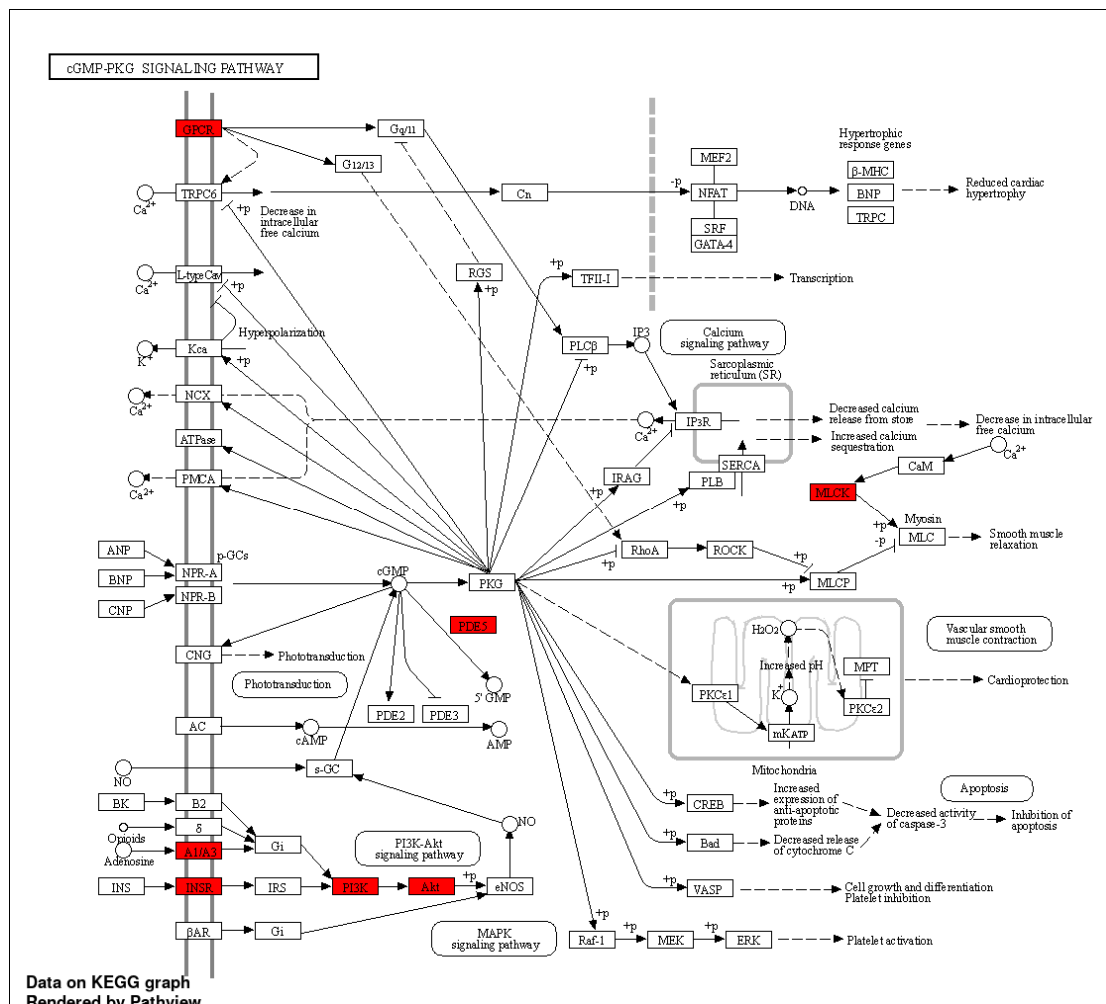

Figure 5. cGMP-Signalling pathway with the targets of DS3 in red

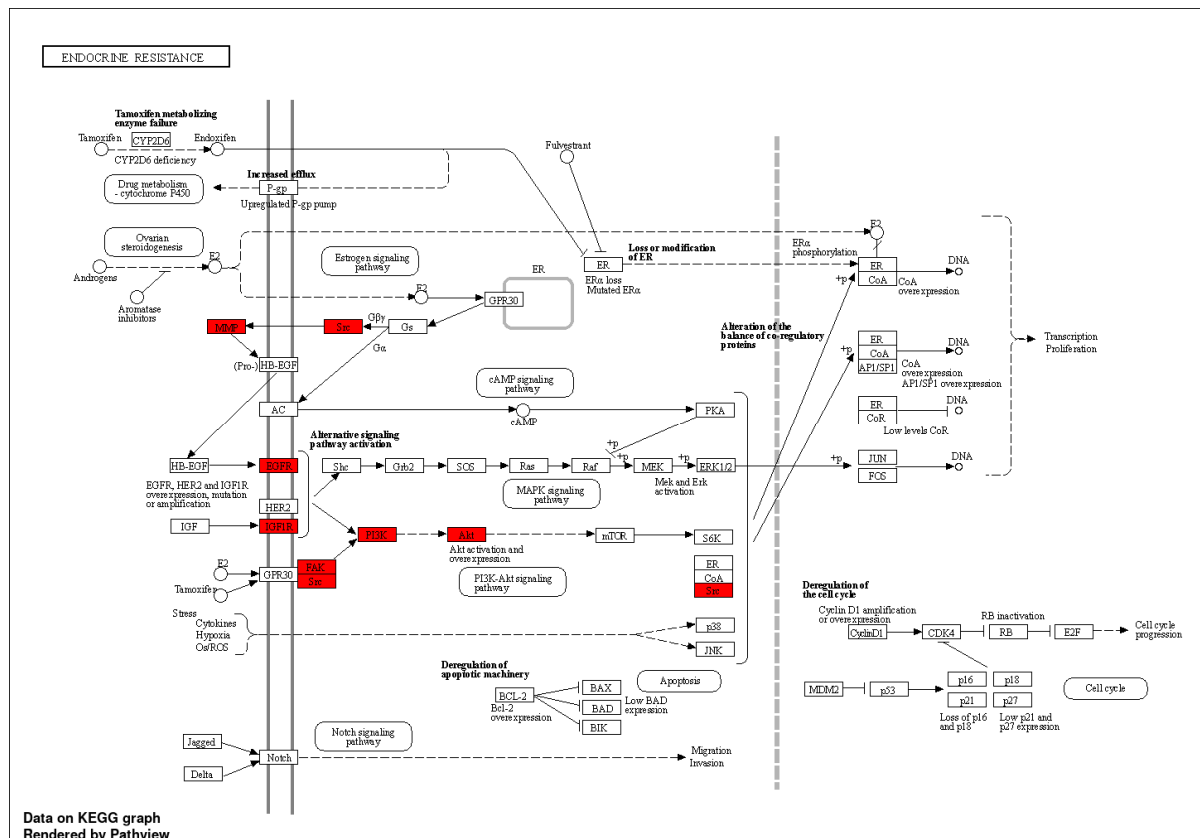

Figure 6. Endocrine Resistance pathway with the targets of DS3 in red

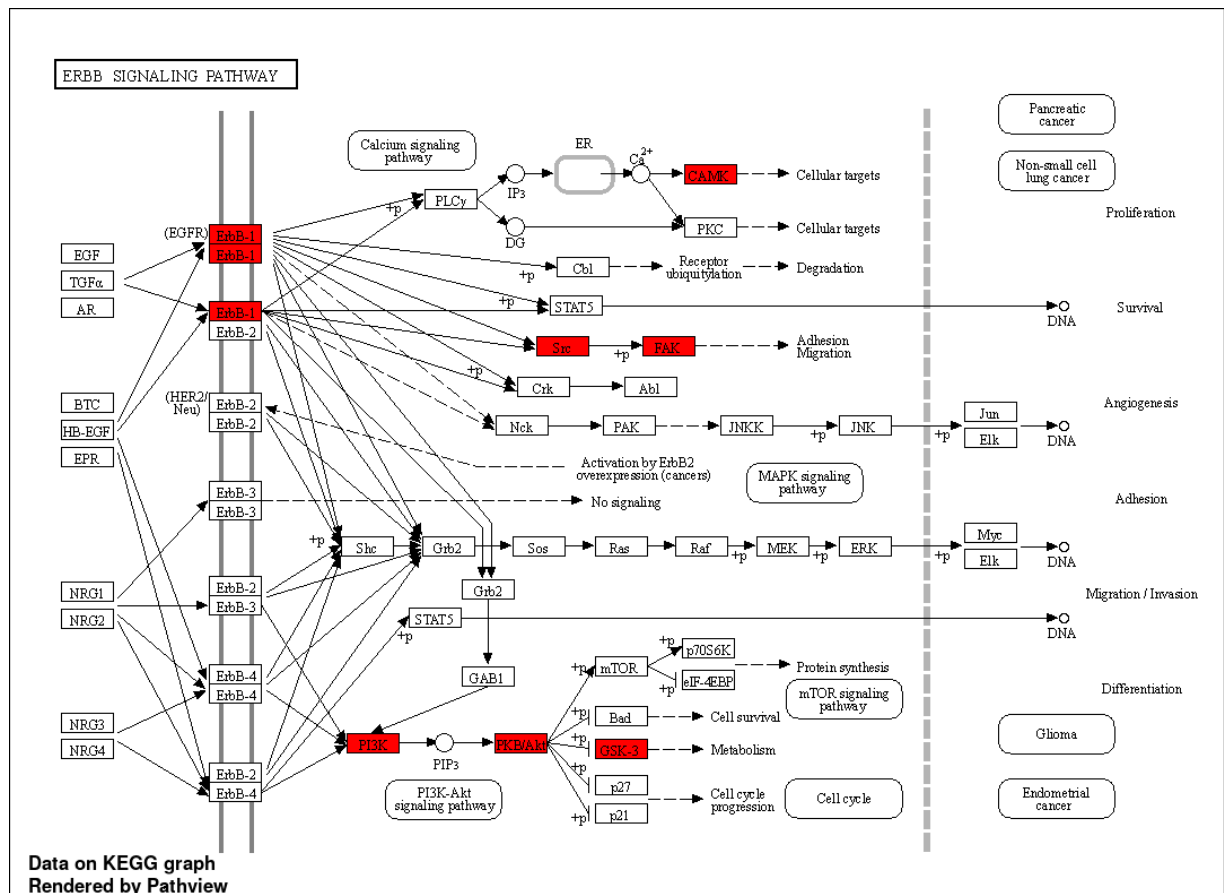

Figure 7. ERBB signaling pathway with the targets of DS3 in red

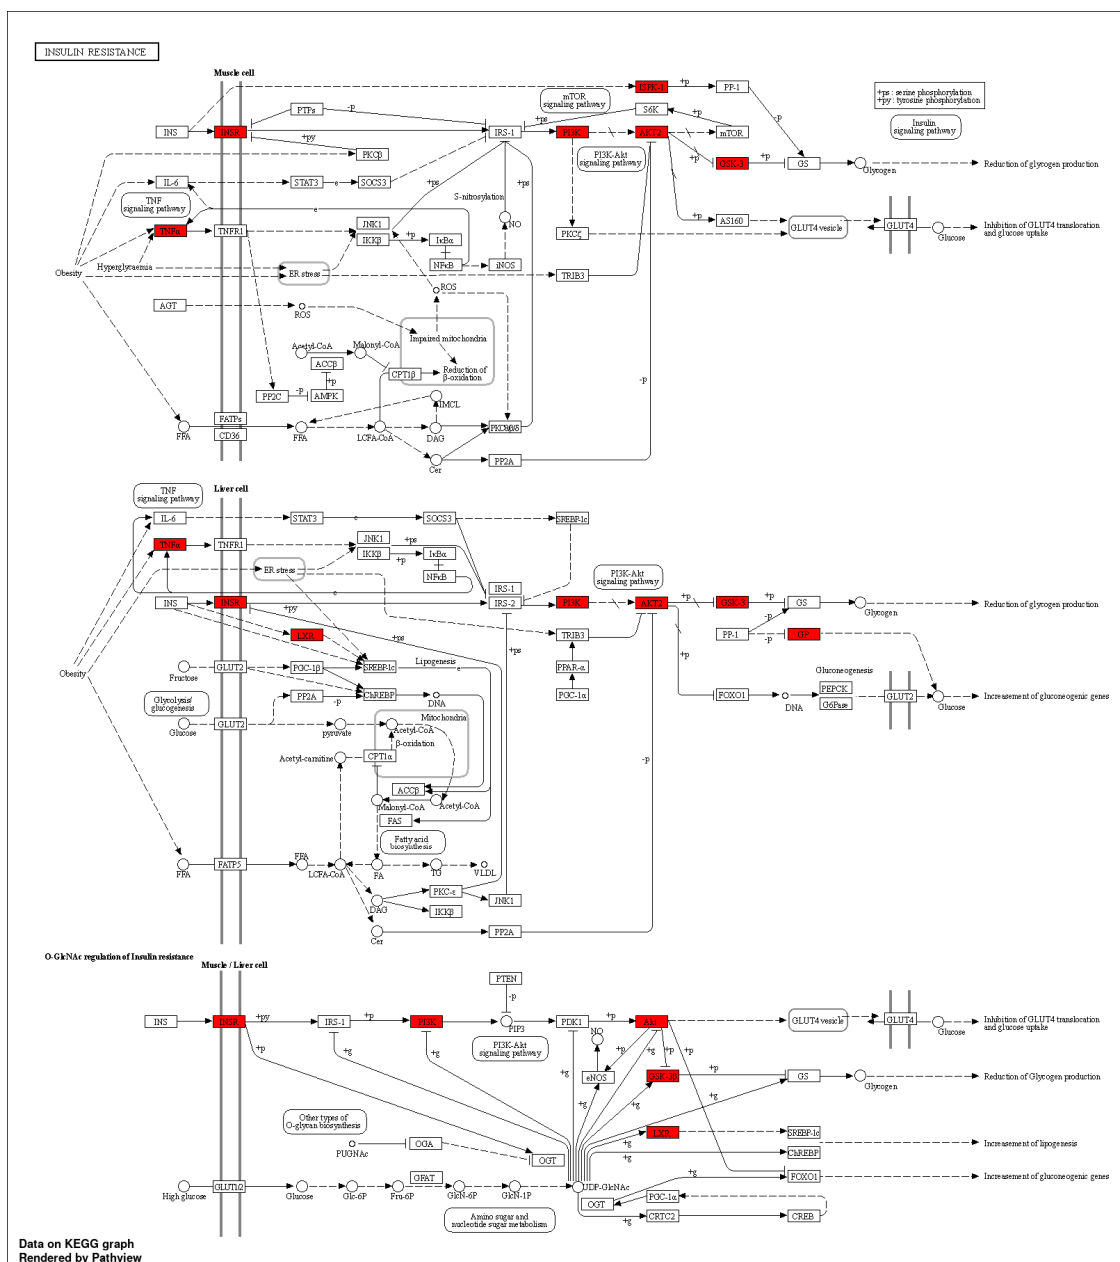

Figure 8. Insulin resistance pathways with the targets of DS3 in red



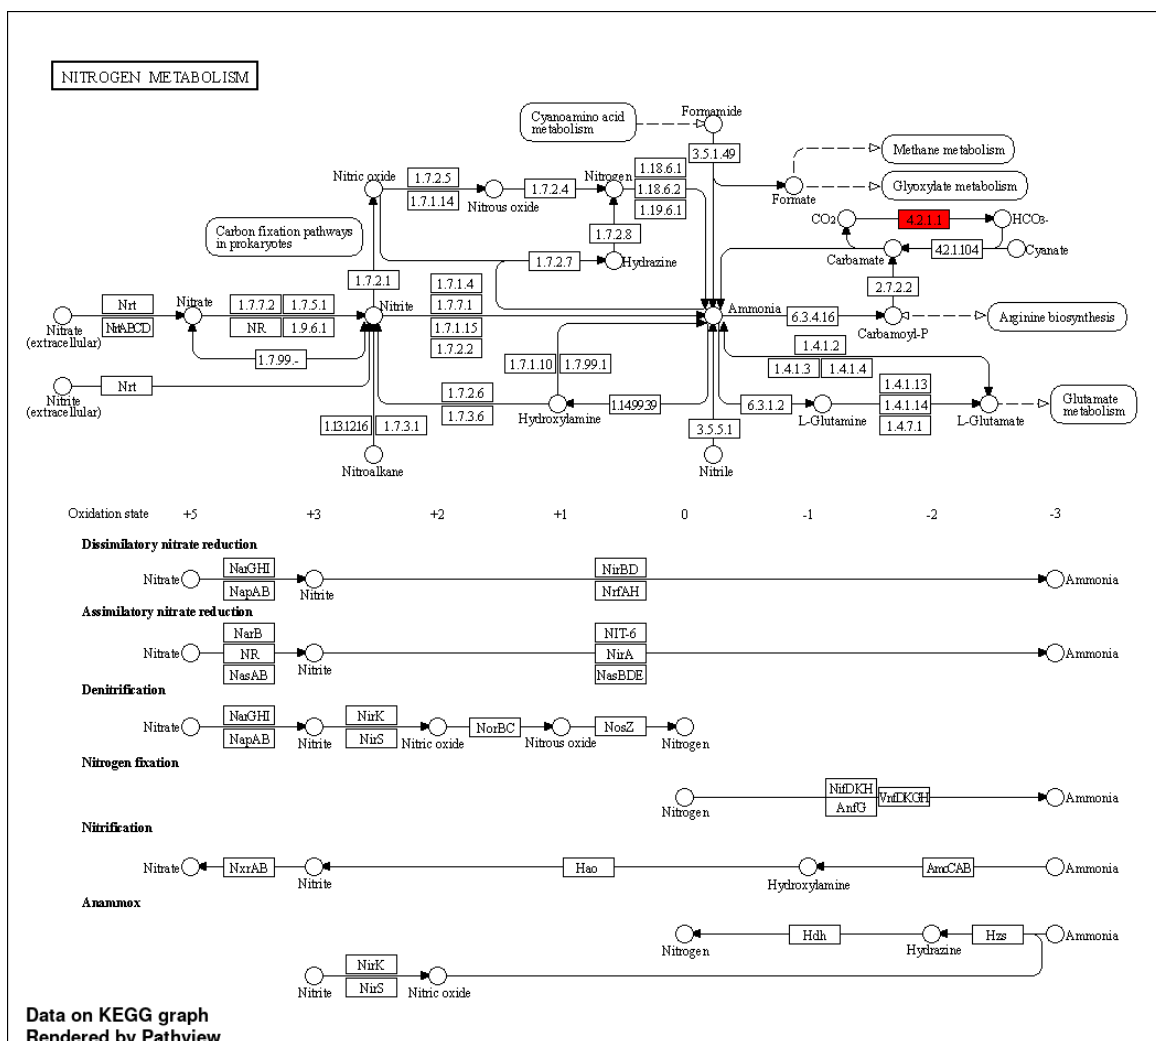

Figure 9. Nitrogen Metabolism pathway with the target of DS3 in red



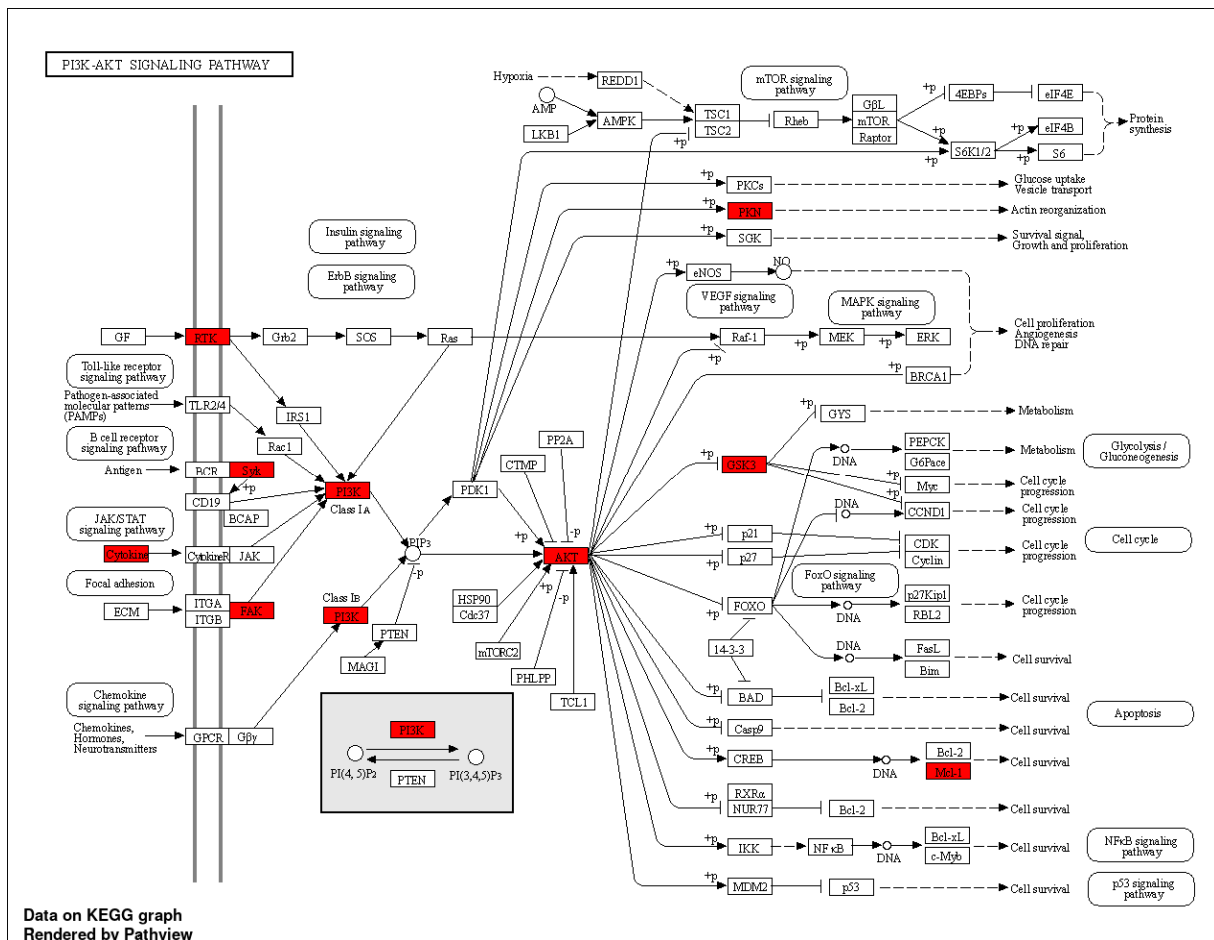

Figure 11. PI3K-AKT signaling pathway with the targets of DS3 in red



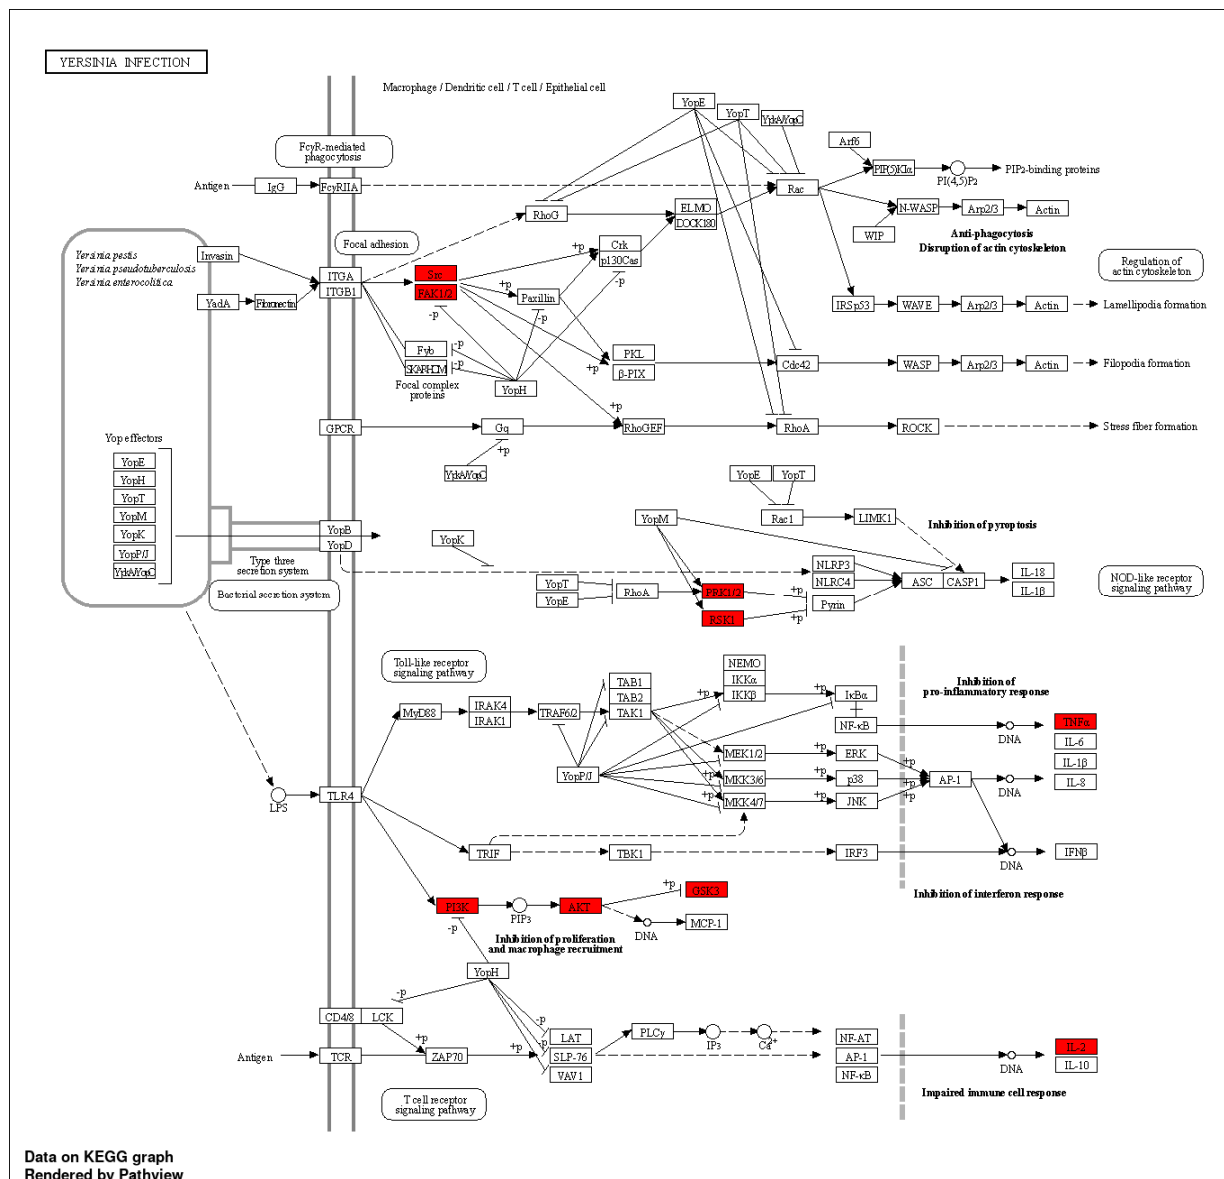

Figure 13. Yersenia Infection pathways with the targets of DS3 in red

### KEGG pathways for QRC

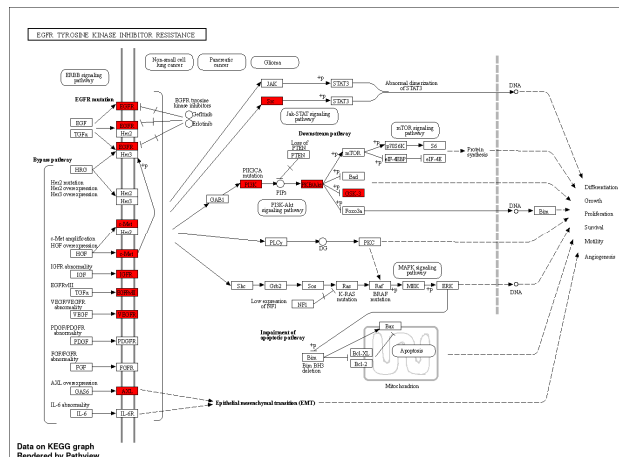

Figure 14. EGFR tyrosine kinase inhibitor resistance with the QRC targets in red

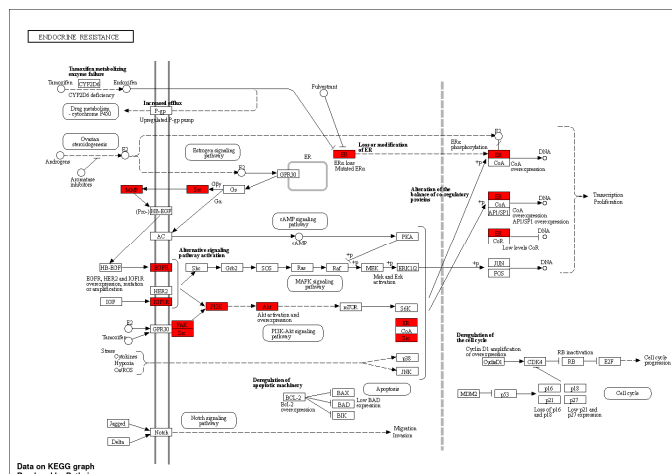

Figure 15. Endocrine resistance pathways with the QRC targets in red

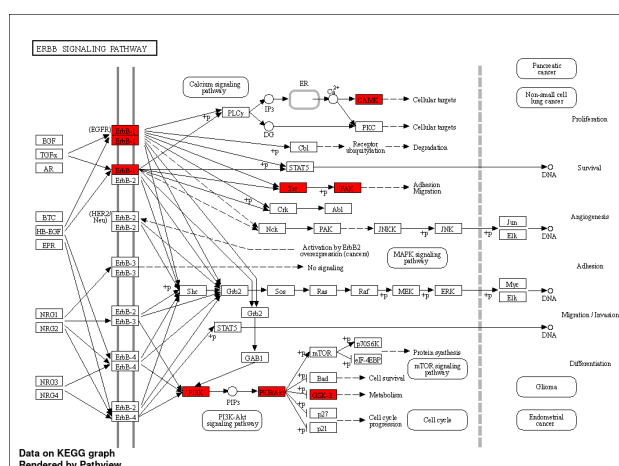

Figure 16. ERBB signaling pathway with the QRC targets in red

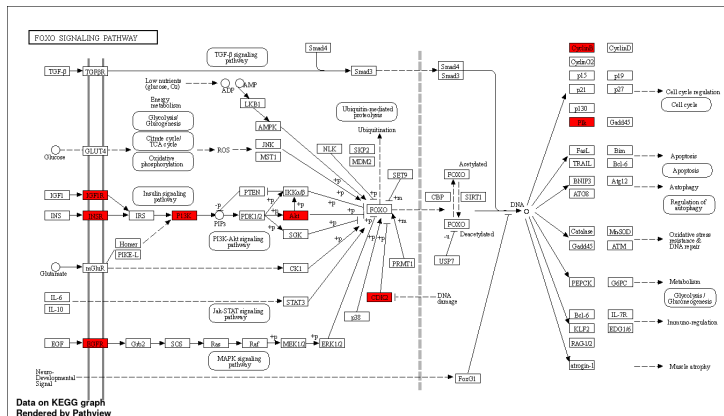

Figure 17. FOXO signaling pathway with the QRC targets in red.

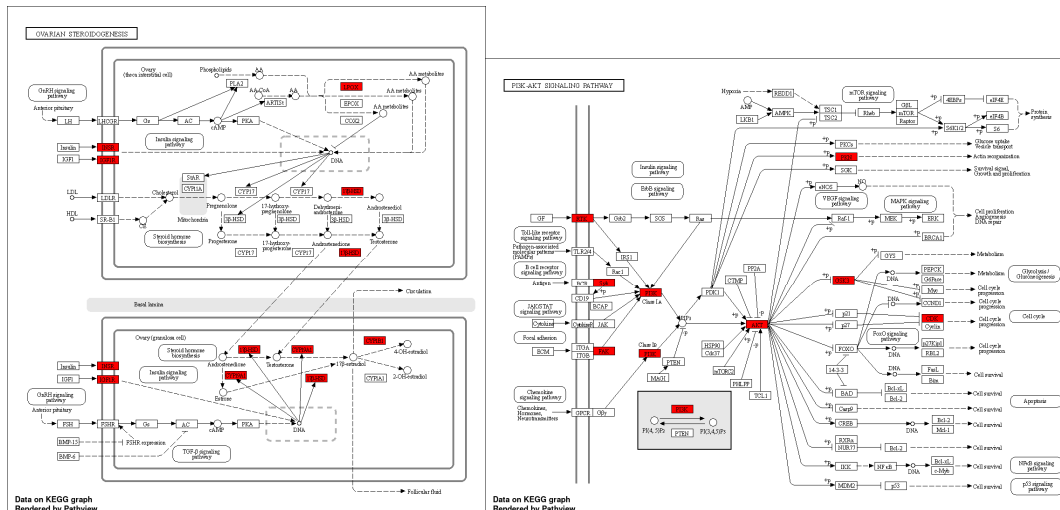

Figure 18. Ovarian steroidogenesis and PI3K-AKT signaling pathways with the QRC targets in red

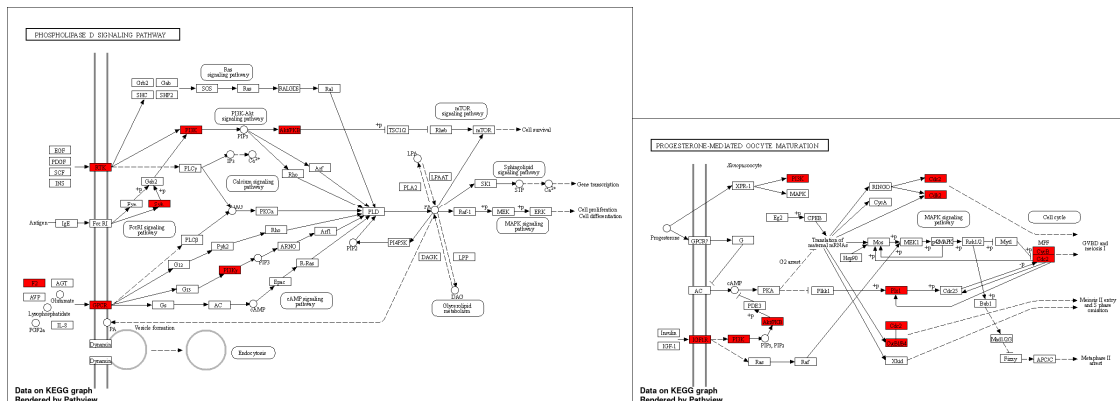

Figure 19. Phospholipase D signaling pathway and Progesterone mediated oocyte maturation with the QRC targets in red

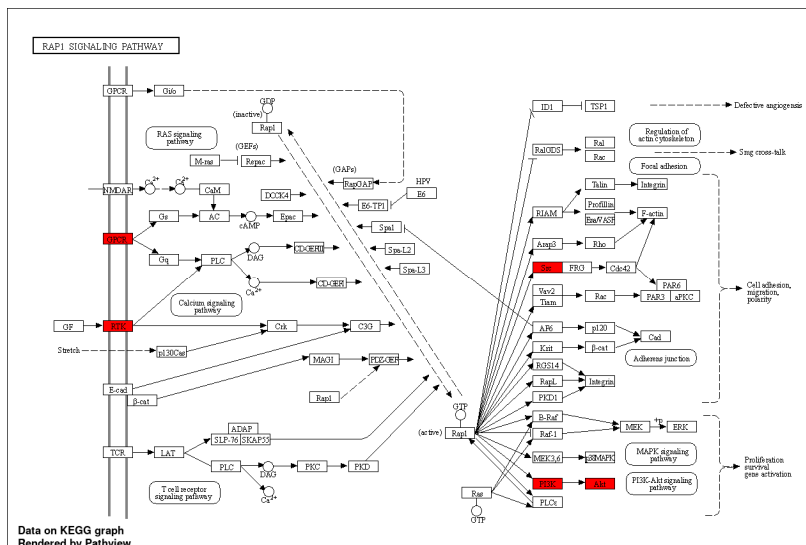

Figure 20. RAP1 signaling pathway with the QRC targets in red

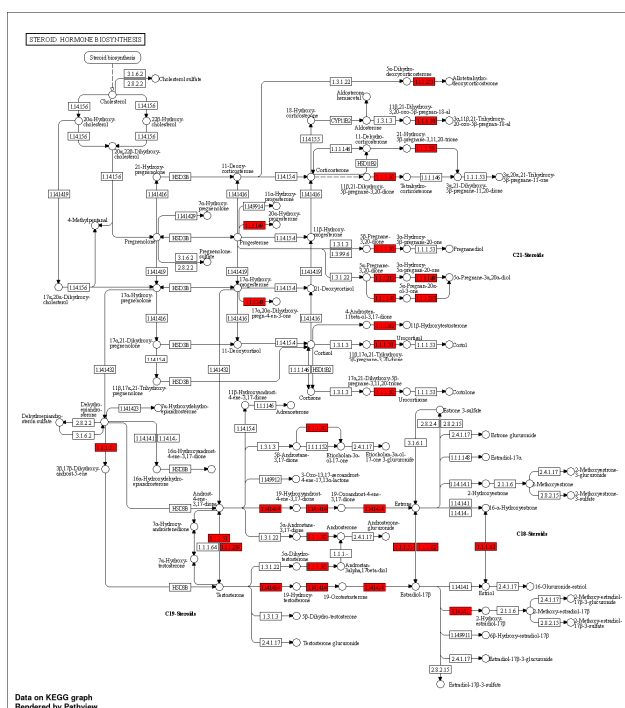

Figure 21. Steroid Hormone Biosynthesis with the QRC targets in red



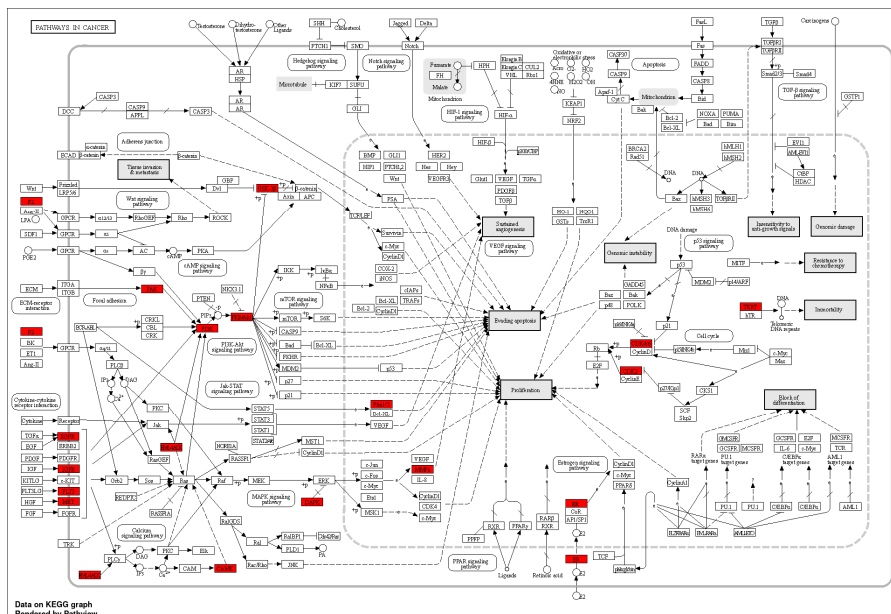

Figure 22. Pathways in cancer with the QRC targets in red

## KEGG pathways for HA

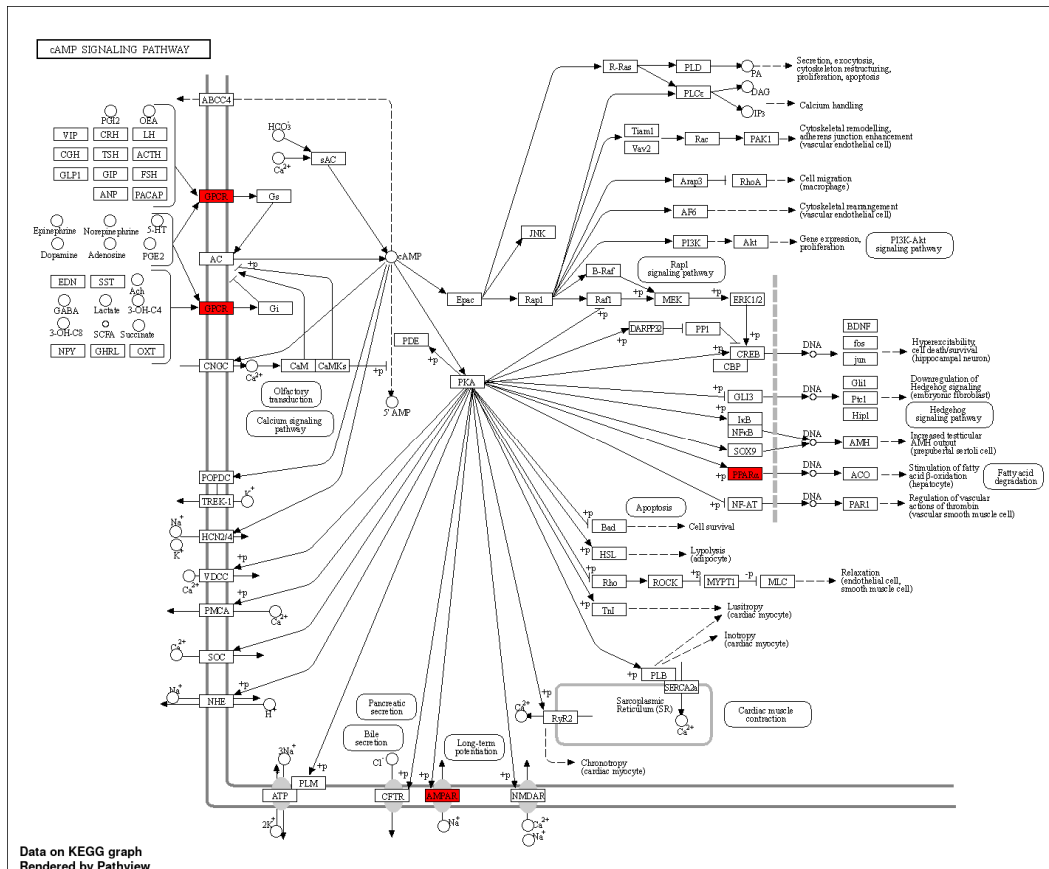

Figure 23. cAMP signaling pathway with the HA targets in red

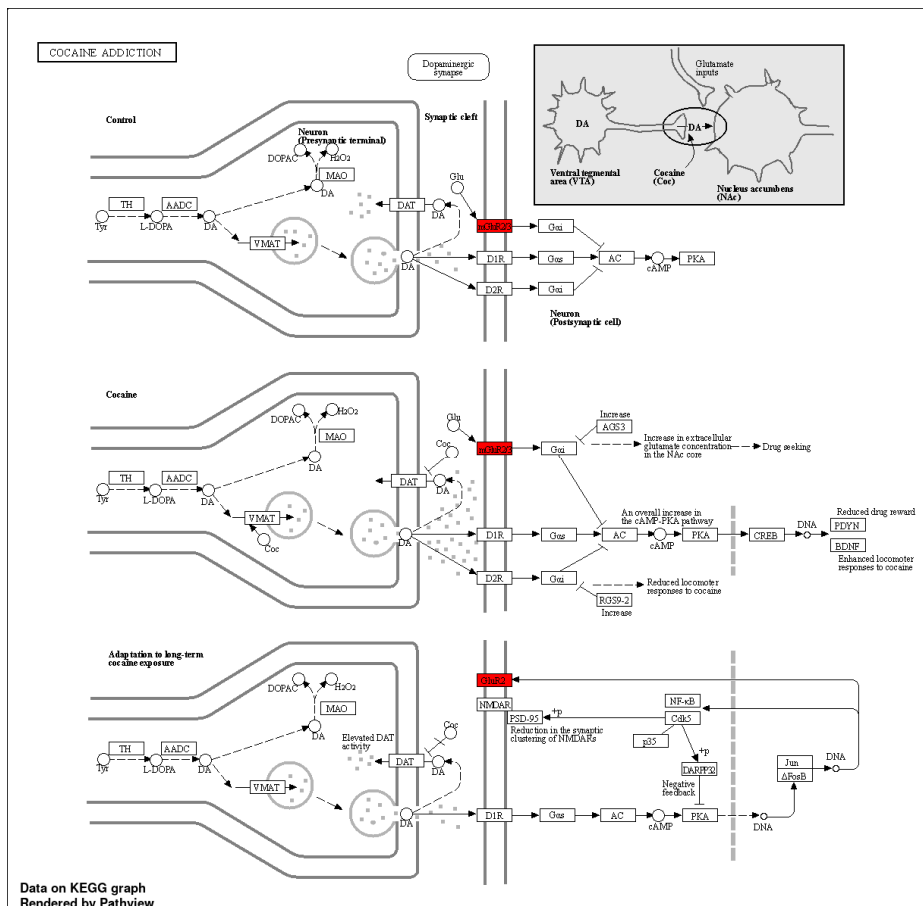

Figure 24. Cocaine addiction pathways with the HA targets in red

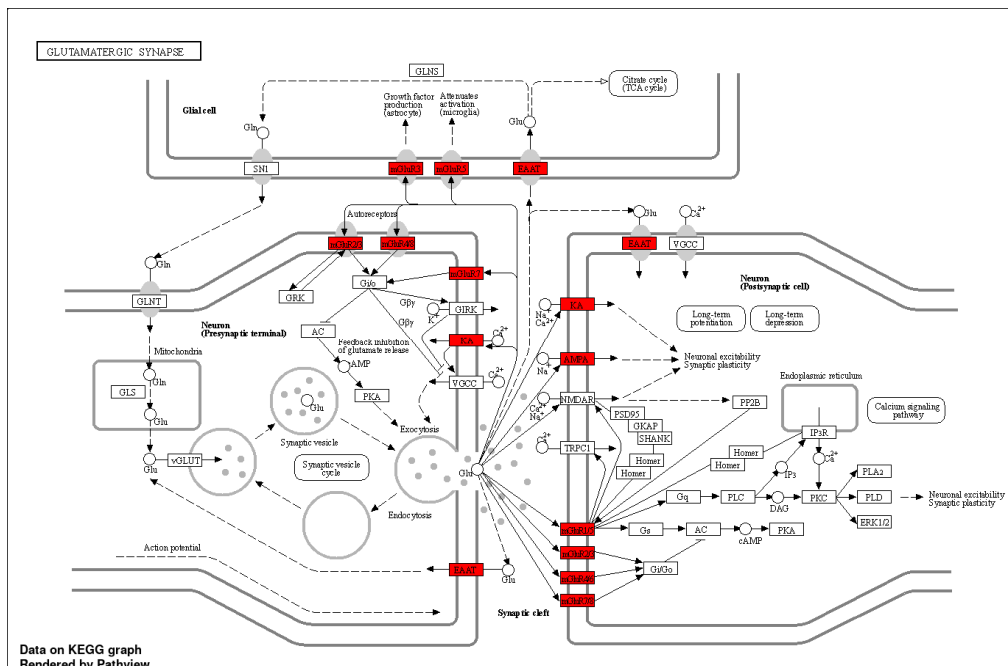

Figure 25. Glutamatergic synapse pathway with the HA targets in red

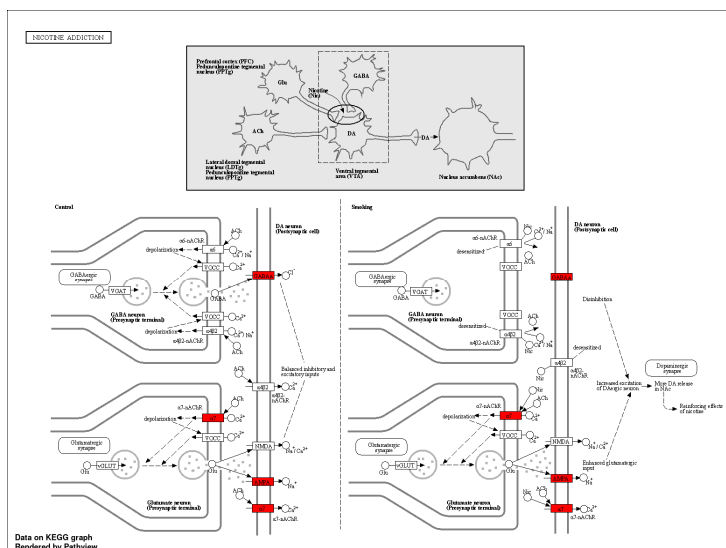

Figure 26. Nicotine addiction pathway with the HA targets in red

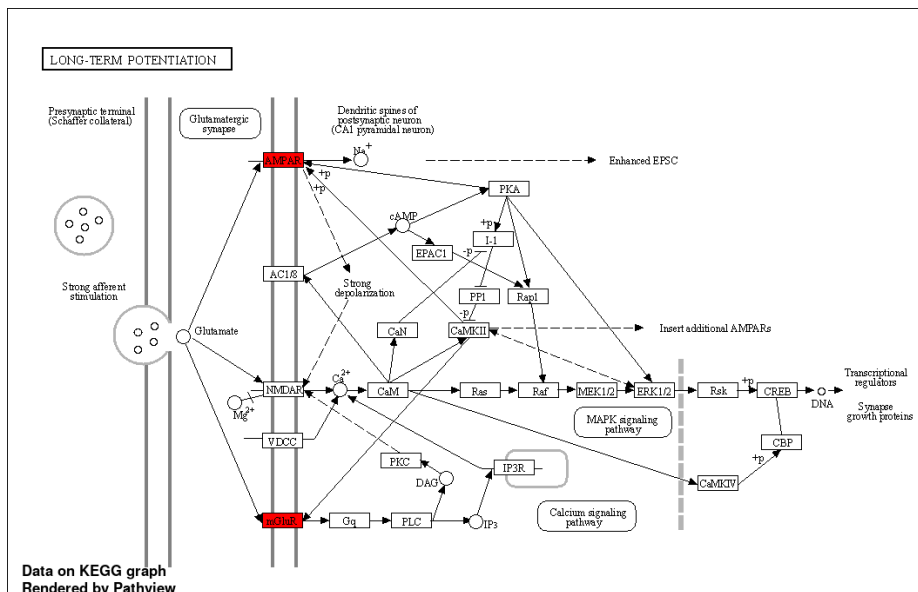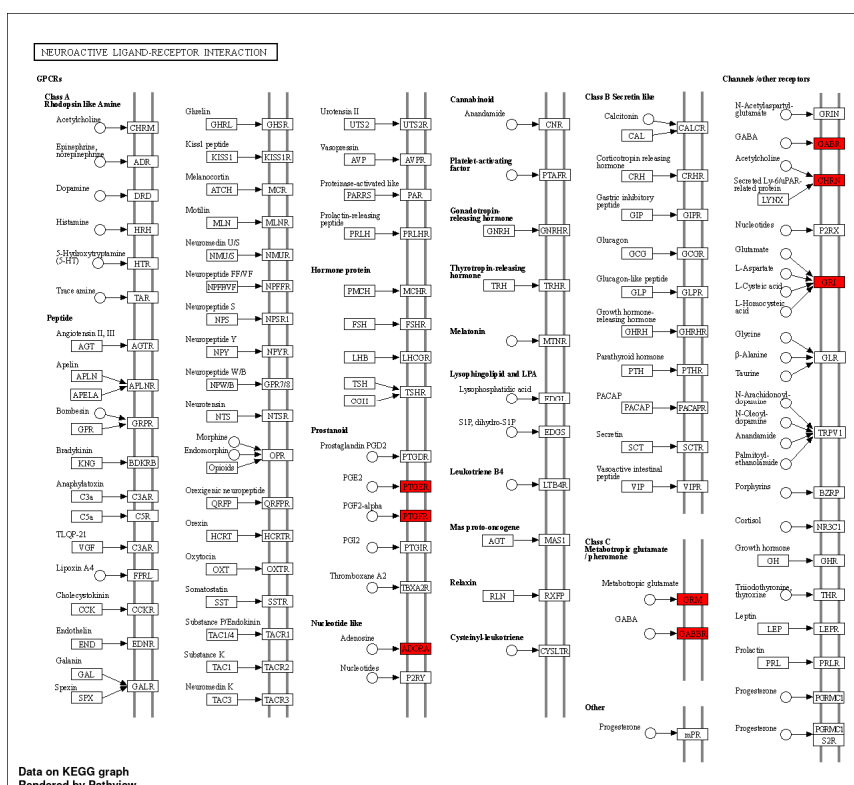

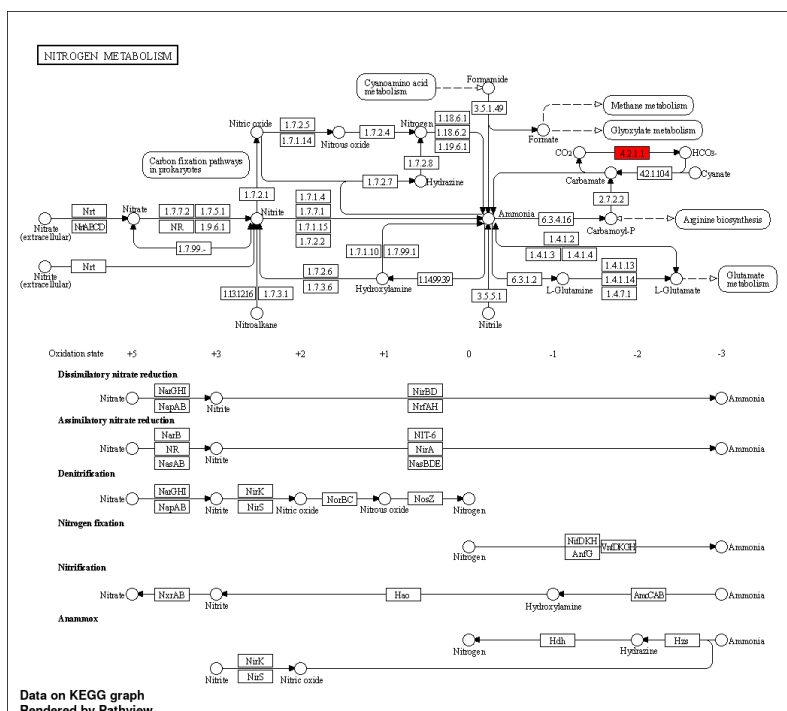

Figure 29. Nitrogen metabolism with the HA targets in red

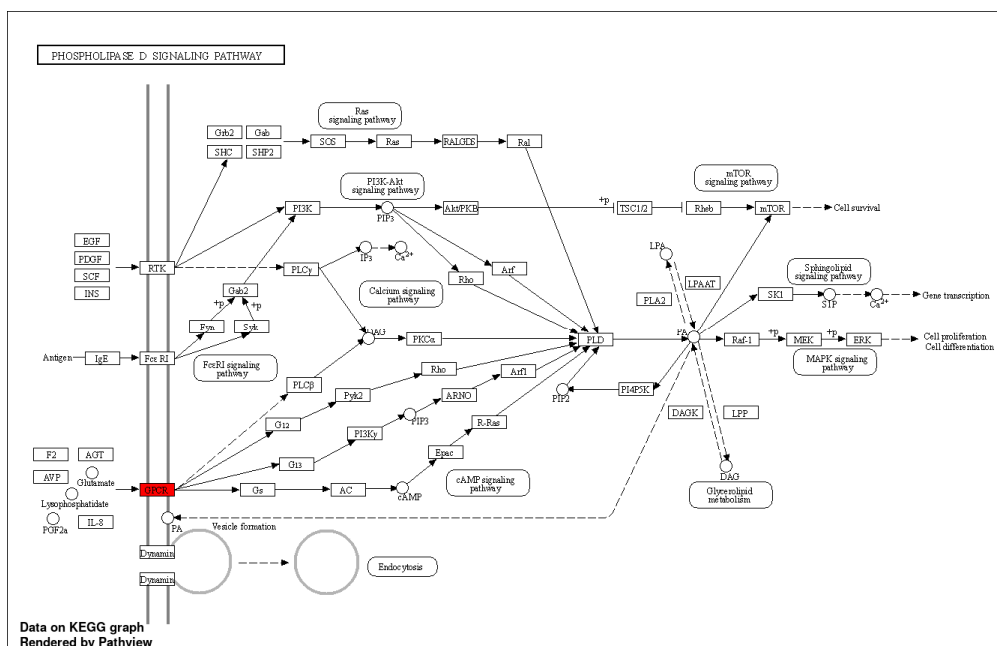

Figure 30. Phospholipase D Signaling pathway with the HA targets in red



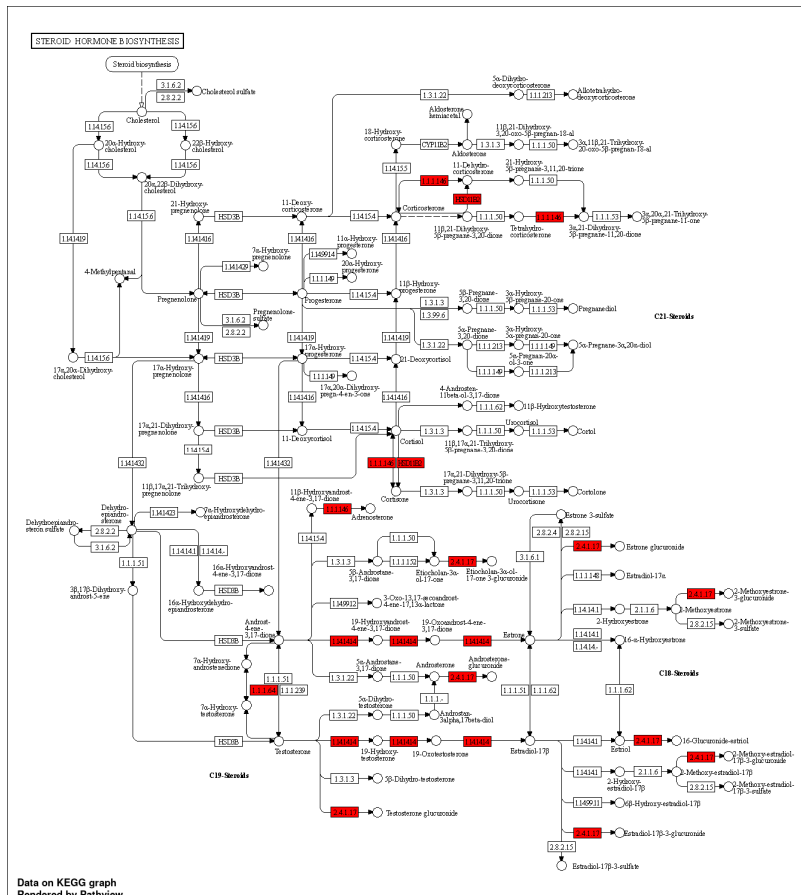

Figure 32. Steroid hormone biosynthesis with the HA targets in red



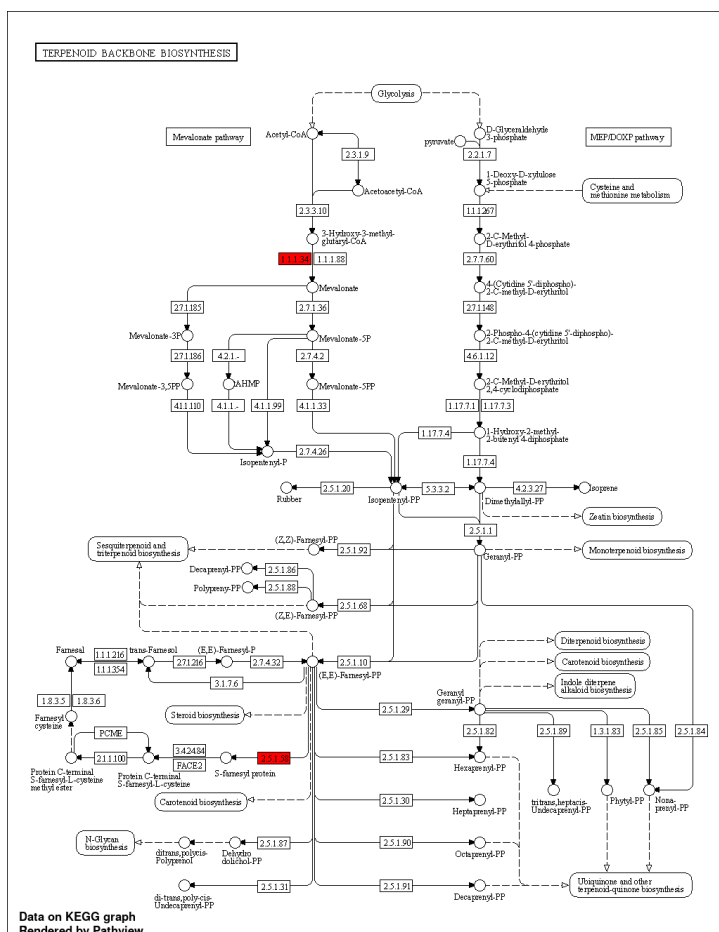

Figure 33. Terpenoid backbone biosynthesis with the HA targets in red
